# Supplementary material
Source: Springer Nature journal article supplement (https://www.springermedizin.de/resource/supplementary/12957_2013_1567_MOESM2_ESM.pdf/9563948)

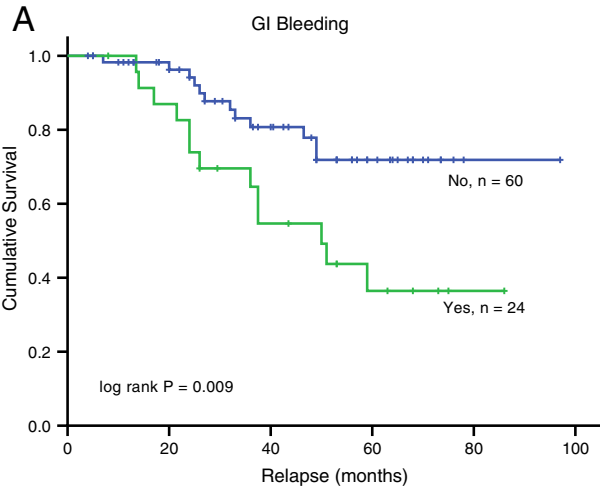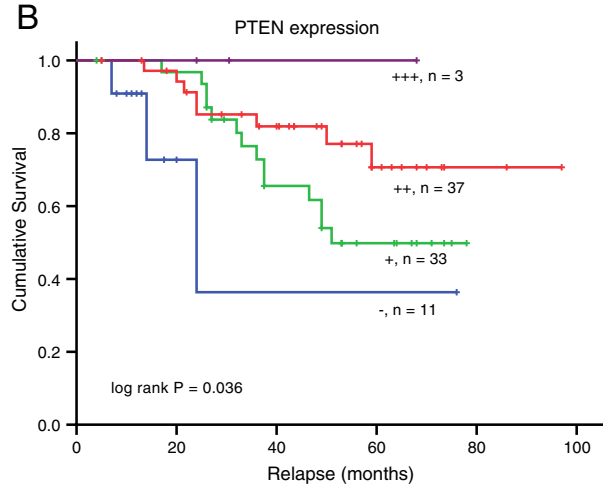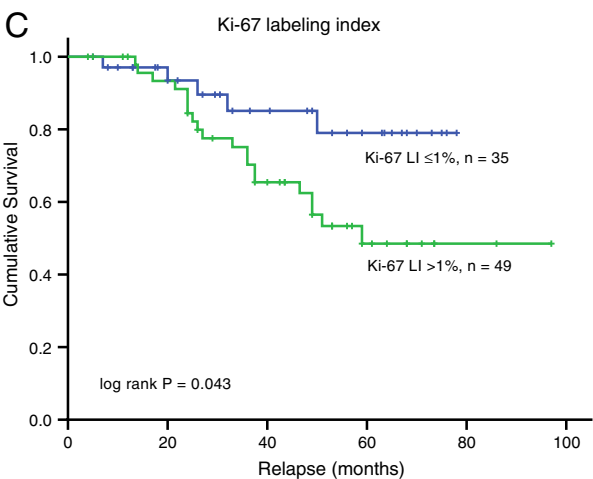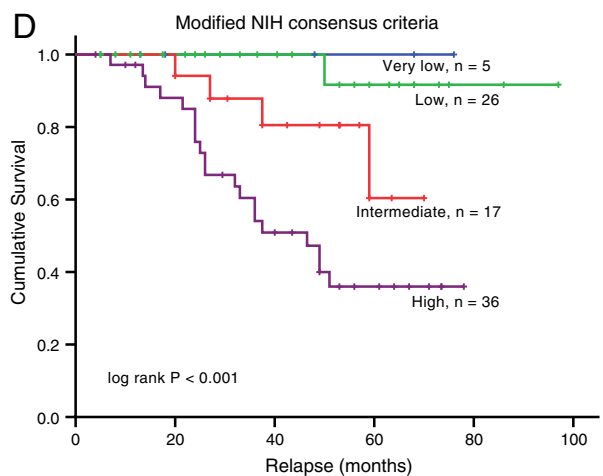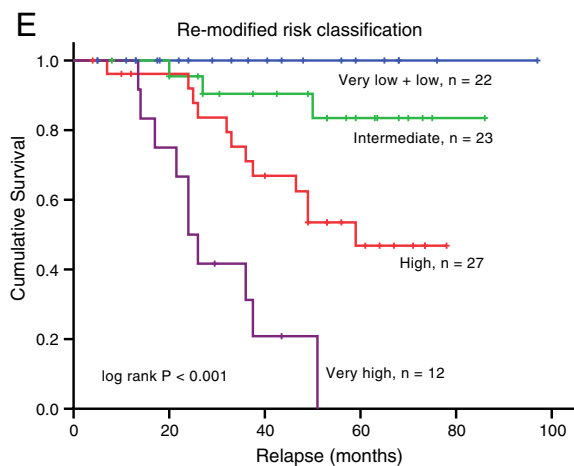

Supplement: MOESM2 [file 9563948]
